# Supplementary material for: Culturable Bacterial Endophytes Associated With Shrubs Growing Along the Draw-Down Zone of Lake Bogoria, Kenya: Assessment of Antifungal Potential Against Fusarium solani and Induction of Bean Root Rot Protection
Source: PubMed Central journal article supplement (PMC8864308; doi:10.3389/fpls.2021.796847), 2022-02-09
Supplement: Table_1.pdf [file Table_1.pdf]

Supplementary Table 1: List of endophytic bacteria isolated in this study and closest relatives in gene bank

| Isolate code | Plant part | Name of source plant       | Closest relative                                            | Accession no. | % similarity |
|--------------|------------|----------------------------|-------------------------------------------------------------|---------------|--------------|
| B01          | Stem       | <i>Solanum incanum</i>     | <i>Bacillus cereus</i>                                      | OK284403      | 100          |
| B02          | Root       | <i>Abutilon fruticosum</i> | <i>Bacillus subtilis</i>                                    | OK284374      | 99.78        |
| B03          | Leaves     | <i>Boerhavia erecta</i>    | <i>Bacillus haynesii</i>                                    | OK284378      | 99.7         |
| B04          | Stem       | <i>Solanum incanum</i>     | <i>Bacillus cereus</i>                                      | OK284402      | 100          |
| B07          | Root       | <i>Solanum incanum</i>     | <i>Bacillus subtilis</i>                                    | OK284377      | 99.79        |
| B08          | Root       | <i>Tephrosia uniflora</i>  | <i>Pseudomonas aeruginosa</i>                               | OK284401      | 99.92        |
| B11          | Leaves     | <i>Boerhavia erecta</i>    | <i>Bacillus subtilis</i> subsp. <i>speizizenii</i>          | OK284400      | 100          |
| B13          | Leaves     | <i>Acalypha fruticosa</i>  | <i>Bacillus cereus</i>                                      | OK284375      | 99.57        |
| B14          | Leaves     | <i>Acalypha fruticosa</i>  | <i>Pseudomonas luteola</i>                                  | OK284376      | 99.77        |
| B16          | Stem       | <i>Rhynchosia Spp.</i>     | <i>Pseudomonas aeruginosa</i>                               | OK284399      | 100          |
| B19          | Root       | <i>Abutilon fruticosum</i> | <i>Enterobacter hormaechei</i> subsp. <i>Xiangfangensis</i> | OK284398      | 99.85        |
| B20          | Seed       | <i>Prosopis juliflora</i>  | <i>Bacillus subtilis</i>                                    | OK284397      | 100          |
| B21          | Stem       | <i>Rhynchosia Spp.</i>     | <i>Pseudomonas aeruginosa</i>                               | OK284381      | 99.33        |
| B22          | Stem       | <i>Acalypha fruticosa</i>  | <i>Bacillus subtilis</i>                                    | OK284396      | 99.92        |
| B23          | Stem       | <i>Tephrosia uniflora</i>  | <i>Bacillus australimaris</i>                               | OK284386      | 100          |
| B30          | Leaves     | <i>Solanum incanum</i>     | <i>Bacillus australimaris</i>                               | OK284384      | 99.78        |
| B31          | Leaves     | <i>Solanum incanum</i>     | <i>Bacillus haynesii</i>                                    | OK284385      | 99.79        |
| B32          | Leaves     | <i>Acalypha fruticosa</i>  | <i>Bacillus velezensis</i>                                  | OK284406      | 98.87        |
| B44          | Root       | <i>Abutilon fruticosum</i> | <i>Bacillus subtilis</i>                                    | OK284391      | 99.85        |
| B52          | Stem       | <i>Abutilon fruticosum</i> | <i>Bacillus velezensis</i>                                  | OK284404      | 100          |
| B35          | Stem       | <i>Solanum incanum</i>     | <i>Bacillus velezensis</i>                                  | OK284389      | 99.87        |
| B36          | Leaves     | <i>Boerhavia erecta</i>    | <i>Micrococcus terreus</i>                                  | OK284395      | 99.7         |
| B37          | Stem       | <i>Ruelia patula</i>       | <i>Bacillus tequilensis</i>                                 | OK284394      | 99.92        |
| B39          | Leaves     | <i>Solanum incanum</i>     | <i>Bacillus aerius</i>                                      | OK284393      | 99.71        |
| B42          | Stem       | <i>Ruelia patula</i>       | <i>Bacillus paramycoides</i>                                | OK284392      | 99.93        |
| B43          | Stem       | <i>Solanum incanum</i>     | <i>Bacillus subtilis</i>                                    | OK284387      | 100          |
| B46          | Root       | <i>Rhynchosia Spp.</i>     | <i>Bacillus halotolerans</i>                                | OK284382      | 98.01        |
| B47          | Stem       | <i>Boerhavia erecta</i>    | <i>Bacillus subtilis</i>                                    | OK284379      | 99.83        |
| B51          | Root       | <i>Rhynchosia Spp.</i>     | <i>Bacillus velezensis</i>                                  | OK284405      | 99.88        |
| B53          | Leaves     | <i>Boerhavia erecta</i>    | <i>Bacillus megaterium</i>                                  | OK284388      | 99.93        |
| B54          | Stem       | <i>Solanum incanum</i>     | <i>Bacillus cereus</i>                                      | OK284383      | 98.92        |

|     |        |                           |                                   |          |       |
|-----|--------|---------------------------|-----------------------------------|----------|-------|
| B55 | Leaves | <i>Tephrosia uniflora</i> | <i>Alkalihalobacillus clausii</i> | OK284380 | 99.11 |
| B56 | Root   | <i>Solanum incanum</i>    | <i>Pseudomonas aeruginosa</i>     | OK284390 | 99.93 |
